# Supplementary material
Source: Springer Nature journal article supplement (https://www.springermedizin.de/resource/supplementary/12907_2013_193_MOESM1_ESM.pdf/9524774)
Supplement: MOESM1 [file 9524774]

SUPPLEMENTARY FIGURE 1

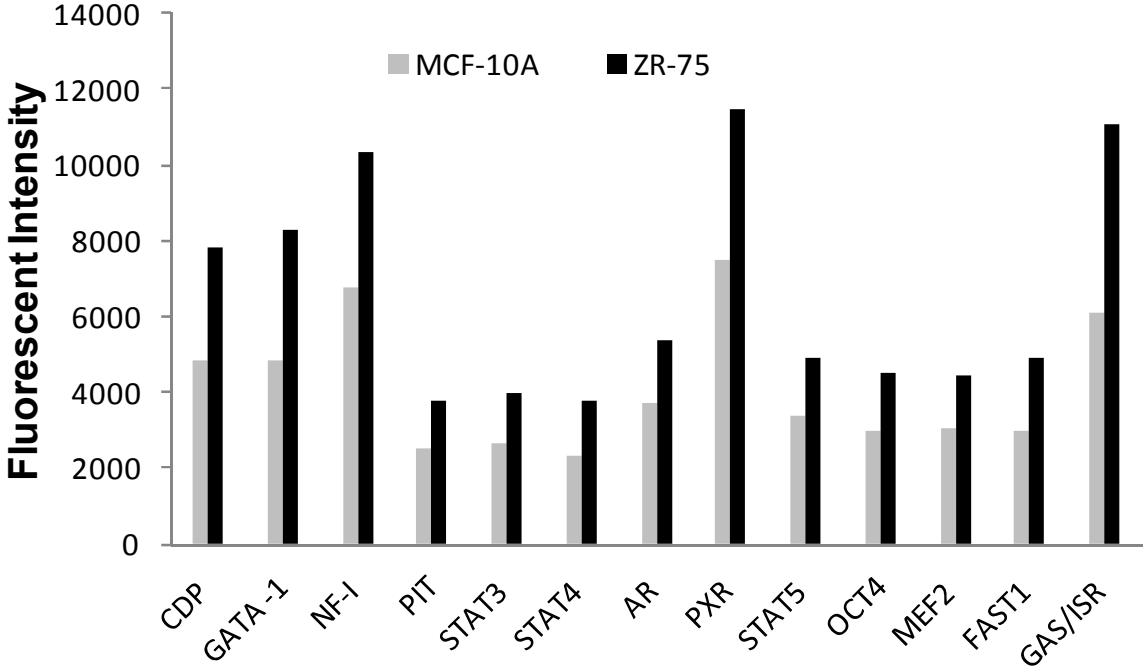

**Supplementary Figure 1. Differential transcription factor activities levels between MCF-10A and ZR-75 cells.** Transcription factor activation profile was determined using a TF Activation Profiling Plate Array as described in Methods. Data chosen from results showing that transcription factor activation level in ZR-75 cells (black bar) was at least 1.5 fold higher than that in MCF-10A cells (gray bar).
